# Supplementary material for: Radical-Scavenging Activatable and Robust Polymeric Binder Based on Poly(acrylic acid) Cross-Linked with Tannic Acid for Silicon Anode of Lithium Storage System
Source: MDPI journal article supplement (doi:10.3390/nano12193437), 2022-09-30
Supplement: s1 [file s1]

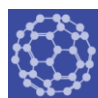

## Article

# Radical-Scavenging Activatable and Robust Polymeric Binder Based on Poly(acrylic acid) Cross-linked with Tannic Acid for Silicon Anode of Lithium Storage System

Hui Gyeong Park <sup>1,†</sup>, Mincheol Jung <sup>2,3,†</sup>, Shinyoung Lee <sup>4</sup>, Woo-Jin Song <sup>2,3,4,\*</sup> and Jung-Soo Lee <sup>1,\*</sup>

<sup>1</sup> Department of Chemical Engineering, Graduate School of Chosun University, 309 Pilmun-daero, Dong-gu, Gwangju 61452, Korea

<sup>2</sup> Department of Polymer Science and Engineering, Chungnam National University, 99 Daehak-ro, Yuseong-gu, Daejeon 34134, Korea

<sup>3</sup> Department of Chemical Engineering and Applied Chemistry, Chungnam National University, 99 Daehak-ro, Yuseong-gu, Daejeon 34134, Korea

<sup>4</sup> Department of Organic Materials Engineering, Chungnam National University, 99 Daehak-ro, Yuseong-gu, Daejeon 34134, Korea

\* Correspondence: wjsong@cnu.ac.kr (W.-J.S.); jslee15@chosun.ac.kr (J.-S.L.); Tel.: +82-62-7163 (W.-J.S.); +82-62-608-5402 (J.-S.L.)

† These authors contributed equally to this study.

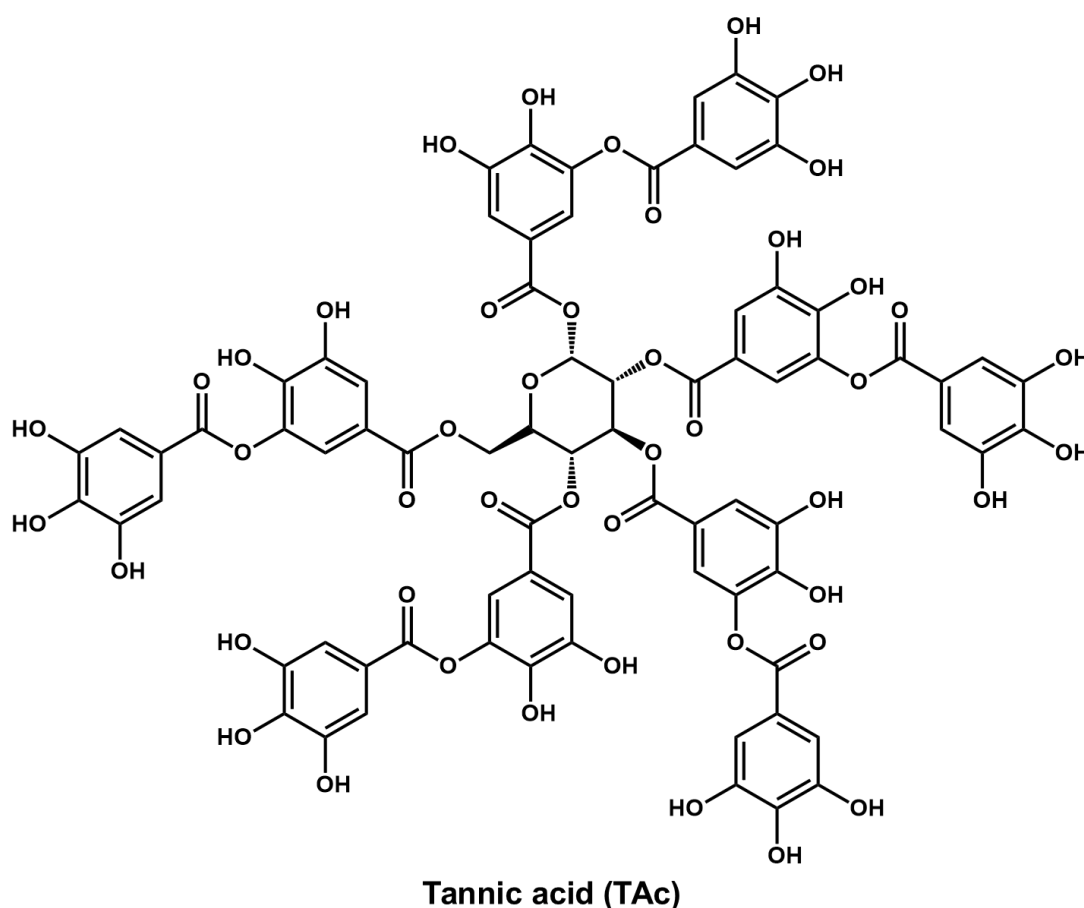

Figure S1. Molecular structure of tannic acid (TAc).

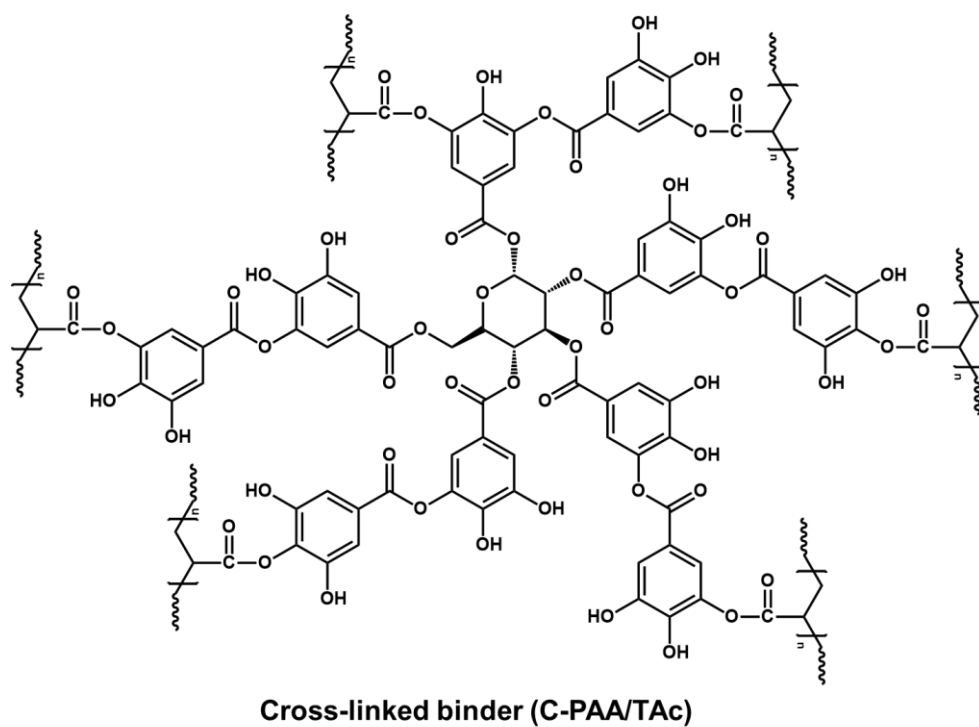

**Figure S2.** Cross-linked binder (C-PAA/TAc) formed by condensation between PAA and TAc.

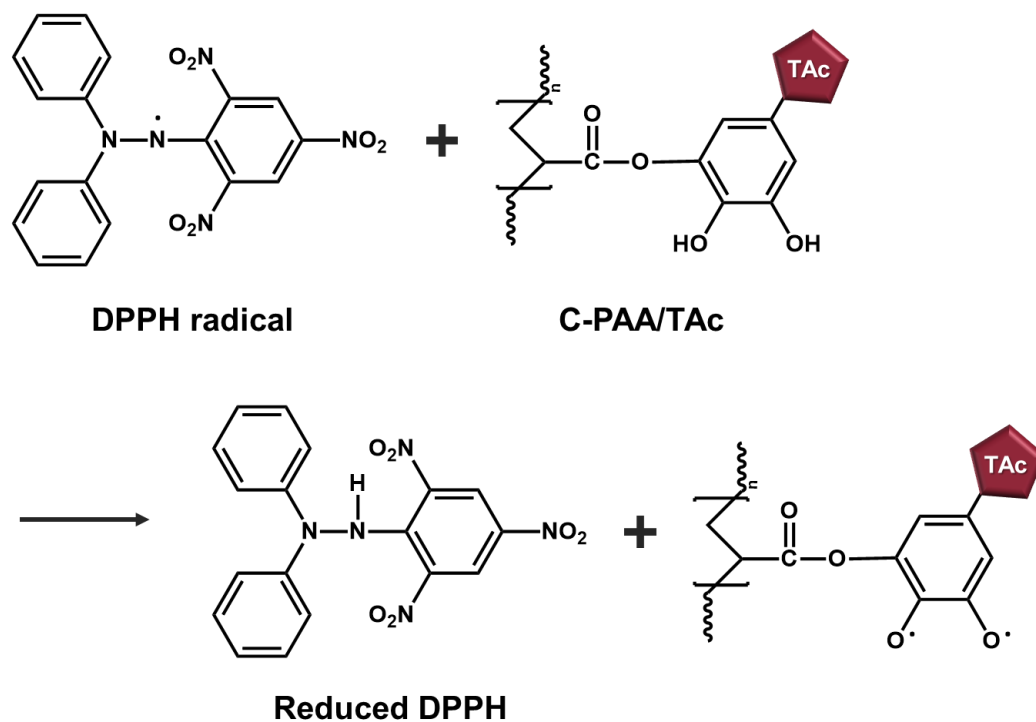

**Figure S3.** Reaction of antioxidant and DPPH free radical.

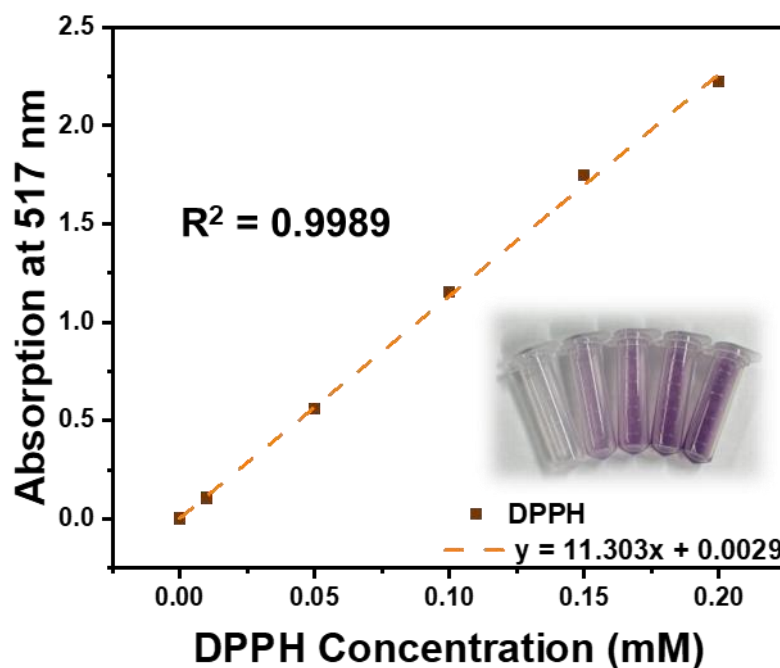

Figure S4. Optimization of DPPH assay: Color response as a function of the DPPH concentration.

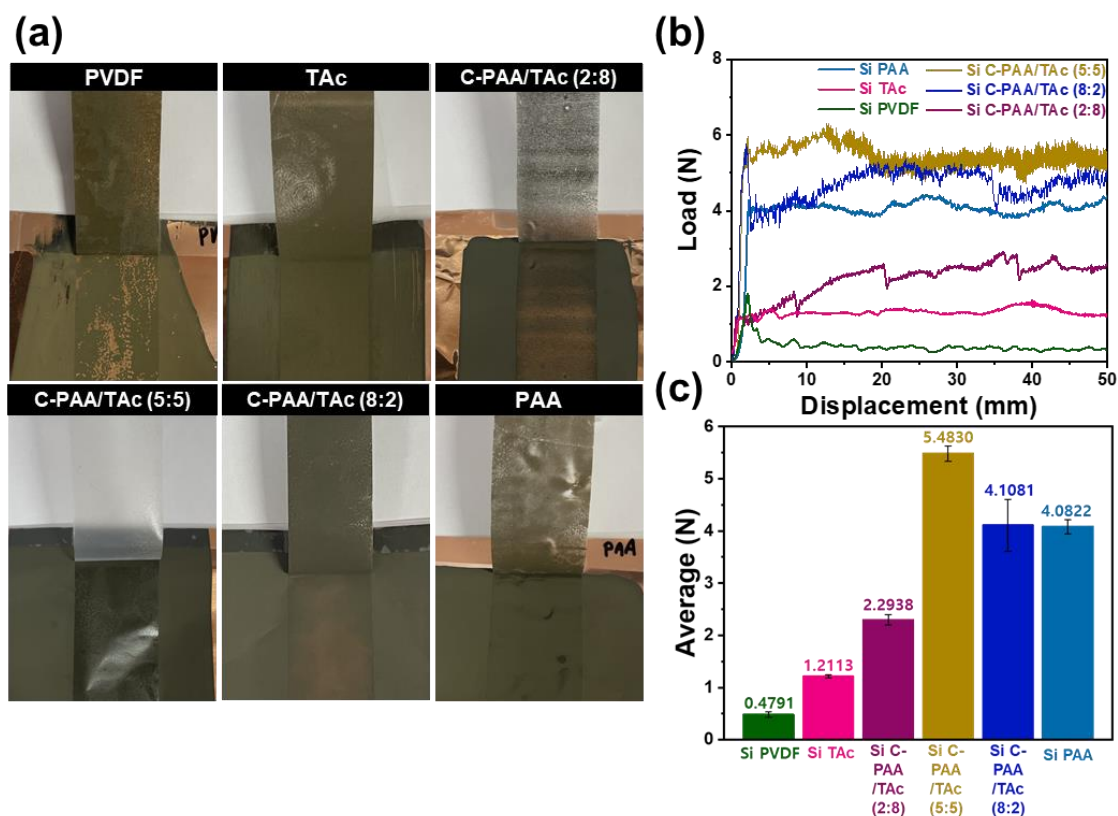

Figure S5. (a) Optical images of the tapes peeled from the Si PVDF, Si TAc, Si C-PAA/TAc, and Si PAA electrodes; (b) 180° peel-off test results of Si PVDF, Si TAc, Si C-PAA/TAc, and Si PAA electrodes EIS data of Si PAA, Si TAc and Si C-PAA/TAc; (c) the average peeling forces.

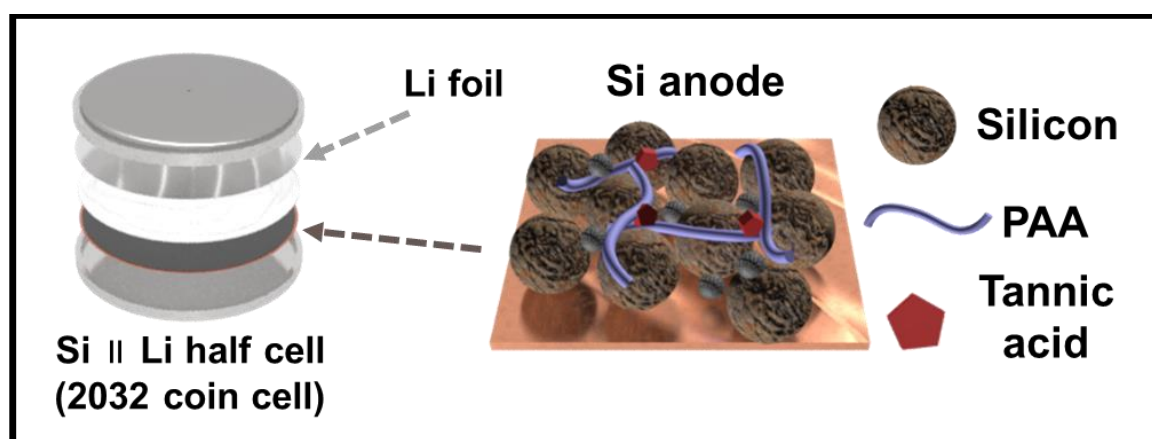

Figure S6. Schematic assembly illustration of Si || Li half cell configuration.

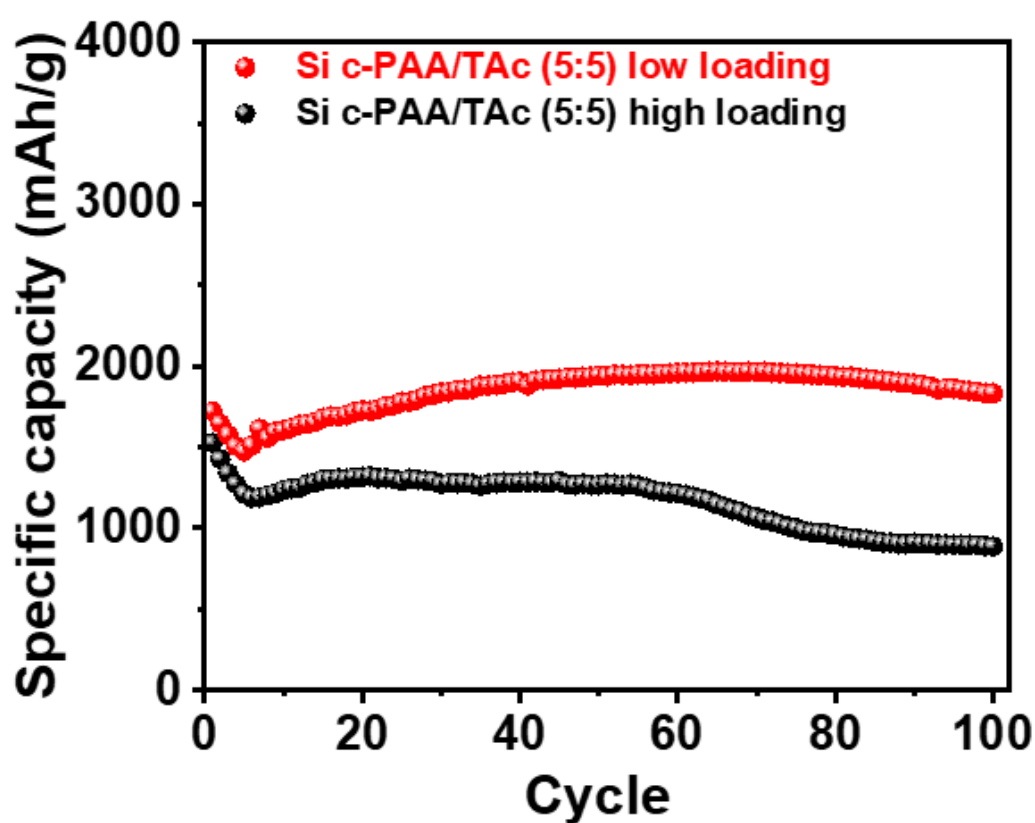

Figure S7. Cycling performance of Si C-PAA/TAc low ( $\sim 0.35 \text{ mg cm}^{-2}$ ) and high ( $\sim 1.1 \text{ mg cm}^{-2}$ ) loading at 0.5 C-rate.

Table S1. Electrochemical performances of Si PAA, Si TAc and Si C-PAA/TAc.

|                    | 1st discharge capacity (mA h g <sup>-1</sup> ) | 1st charge capacity (mA h g <sup>-1</sup> ) | 1st cycle efficiency (%) | 100th cycle capacity (mA h g <sup>-1</sup> ) | Capacity retention (100th cycle) |
|--------------------|------------------------------------------------|---------------------------------------------|--------------------------|----------------------------------------------|----------------------------------|
| Si PAA             | 2583                                           | 2126                                        | 82.30                    | 1072                                         | 67.61                            |
| Si TAc             | 2205                                           | 1617                                        | 73.33                    | 1112                                         | 61.74                            |
| Si C-PAA/Tac (5:5) | 2692                                           | 2195                                        | 81.53                    | 1833                                         | 106.5                            |

|                           |      |      |       |      |       |
|---------------------------|------|------|-------|------|-------|
| Si C-<br>PAA/Tac<br>(8:2) | 2706 | 2235 | 82.59 | 1545 | 90.35 |
| Si C-<br>PAA/Tac<br>(2:8) | 2595 | 2061 | 79.42 | 1193 | 69.36 |

**Table S2.** EIS data of Si PAA, Si TAc and Si C-PAA/TAc after 100th cycle.

|                    | <b>R<sub>s</sub> at 100th cycle</b> | <b>R<sub>SEI</sub> at 100th cycle</b> | <b>R<sub>CT</sub> at 100th cycle</b> |
|--------------------|-------------------------------------|---------------------------------------|--------------------------------------|
| Si PAA             | 8.57                                | 11.23                                 | 144.33                               |
| Si TAc             | 3.01                                | 7.17                                  | 85.76                                |
| Si C-PAA/Tac (5:5) | 2.84                                | 5.98                                  | 85.10                                |
| Si C-PAA/Tac (8:2) | 6.11                                | 5.99                                  | 70.27                                |
| Si C-PAA/Tac (2:8) | 4.82                                | 7.69                                  | 116.27                               |
